# Supplementary material
Source: PubMed Central journal article supplement (PMC3864864)
Supplement: NIHMS476272-supplement-supplemental_data.pdf [file NIHMS476272-supplement-supplemental_data.pdf]

# Supplementary Materials for A Spatial Time-to-Event Approach for Estimating Associations between Air Pollution and Preterm Birth

Howard H. Chang

Department of Biostatistics and Bioinformatics  
Emory University, Atlanta GA, USA  
howard.chang@emory.edu

Brian J. Reich

Department of Statistics  
North Carolina State University, Raleigh NC, USA

Marie Lynn Miranda

School of Natural Resources and Environment  
University of Michigan, Ann Arbor MI, USA

## 1 Model for discrete-time spatially-referenced survival data

For subject  $i = 1, \dots, n$ , we observe the follow-up time  $t_i$ , an indicator of whether the subject was censored  $c_i$ , and the spatial location  $s_i$ . We also observe potentially time-dependent covariates  $\mathbf{X}_i(t) = (1, X_{1i}(t), \dots, X_{pi}(t))'$ , where  $\mathbf{X}_i(t)$  is the  $(p + 1)$ -vector of covariates for subject  $i$  at time  $t$  and the first element of  $\mathbf{X}_i(t)$  is reserved for the intercept. We assume discrete domains for both the spatial locations and event times, that is,  $s_i \in \{1, \dots, n_s\}$  and  $t_i \in \{1, \dots, n_t\}$ .

We model the survival probability as

$$P(t_i > m) = \prod_{t=1}^m [1 - \pi(\mathbf{X}_i(t), s_i, t)] \quad (1)$$

$$\pi(\mathbf{X}_i(t), s_i, t) = \Phi[\mathbf{X}_i(t)' \boldsymbol{\beta}(s_i, t)], \quad (2)$$

where  $\Phi$  is the standard normal distribution function and  $\boldsymbol{\beta}(s, t) = [\beta_0(s, t), \dots, \beta_p(s, t)]'$  is a vector of regression coefficients for location  $s$  and time  $t$ .

Let  $\beta_0(s, t) = \eta_0 + \mu_0(s) + \gamma_0(t) + \theta_0(s, t)$ , where  $\eta_0$  is the overall average;  $\mu_0(s)$  is a spatial effect;  $\gamma_0(t)$  is a temporal effect; and  $\theta_0(s, t)$  is the space/time interaction. We temporarily drop the subscript  $j$ , and note that the covariate effects  $\beta_j(s, t)$  for  $j = 1, \dots, p$  are modeled similarly below.

The spatial terms  $\boldsymbol{\mu} = [\mu(1), \dots, \mu(S)]'$  are modeled using the conditionally autoregressive model (CAR). Let  $s \sim s'$  indicate that regions  $s$  and  $s'$  are spatial neighbors and  $m_s$  be the number of spatial neighbors of region  $s$ . The full conditional distribution is Gaussian with

$$E[\mu(s)|\mu(s'), s' \neq s] = \rho_\mu \sum_{s' \sim s} \mu(s')/m_s \quad (3)$$

$$V[\mu(s)|\mu(s'), s' \neq s] = \sigma_\mu^2/m_s. \quad (4)$$

The joint model for the vector  $\boldsymbol{\mu}$  is multivariate normal with mean zero and covariance  $\sigma_\mu^2 [M_S - \rho_\mu C_S]^{-1}$ , where the  $(s, s')$  element of  $C_S$  is  $C_S(s, s') = I(s \sim s')$  and  $M_S$  is diagonal with diagonal elements  $\sum_{s' \neq s} C_S(s, s') = m_s$ . We denote this model as  $\boldsymbol{\mu} \sim \text{CAR}(\rho_\mu, \sigma_\mu^2, C_S)$ .

The temporal effects  $\boldsymbol{\gamma} = [\gamma(1), \dots, \gamma(T)]'$  control the spatial average baseline hazard function. The vector  $\boldsymbol{\gamma}$  has a lag-1 autoregressive model which can be written  $\boldsymbol{\gamma} \sim \text{CAR}(\rho_\gamma, \sigma_\gamma^2, C_T)$ , where  $C_T$  is the  $n_t \times n_t$  temporal adjacency matrix with  $(t, t')$  element equal to  $I(|t - t'| = 1)$ . The spatio-temporal random effects have the dynamic spatial model (Banerjee *et al.*, 2003),

$$\theta(s, t) = \rho_\theta \theta(s, t - 1) + \delta(s, t) \quad (5)$$

where  $\rho_\theta \in (0, 1)$  and  $\boldsymbol{\delta}_t = [\delta(1, t), \dots, \delta(S, t)]' \sim \text{CAR}(\rho_\delta, \sigma_\delta^2, C_S)$ . For identification purposes we fix  $\theta(s, 1) = 0$  for all  $s$ .

## 1.1 Priors

To complete the Bayesian model, we specify priors for the remaining parameters. Let  $\eta_j \sim N(0, c_j^2)$ . To give vague priors for these overall averages we take  $c_j = 100^2$ . The variances  $\sigma_{\mu_j}^2$ ,  $\sigma_{\gamma_j}^2$ , and  $\theta_{\theta_j}^2 \sim \text{Gamma}(a_1, b_1)$ . Following Kelsall *et al.* (1999), we take  $a_1 = 0.5$  and  $b_1 = 0.005$ . The CAR association parameters  $\rho_{\mu_j}$ ,  $\rho_{\gamma_j}$ ,  $\rho_{\theta_j}$ ,  $\rho_{\delta_j} \sim \text{Beta}(a_2, b_2)$ . To facilitate MCMC sampling we discretize the prior to 1000 equally-spaced points spanning  $[0, 1]$ , and to give an uninformative prior we take  $a_2 = b_2 = 1$ .

## 1.2 Markov Chain Monte Carlo Algorithm

For notational convenience, in the description of the full conditionals let  $\boldsymbol{\beta}^*(s_i, t)$  denote the coefficient vector  $\boldsymbol{\beta}(s_i, t)$  with the element under consideration set to zero. For example, in the description of the full conditional for  $\eta_j$ , denote  $\beta_j^*(s, t) = \mu_j(s) + \gamma_j(t) + \theta_j(s, t)$ . Then  $r_i(t) = Z_i(t) - \mathbf{X}_i(t)' \boldsymbol{\beta}^*(s_i, t)$  is the residual calculated without the variable under consideration. We initialize the MCMC algorithm by setting  $\beta_j(s, t) = 0$  for all  $s$  and  $t$  and all CAR covariance parameters equal to one. Sampling then proceeds by repeatedly sampling each parameter conditioned on all others in the following steps.

1.  $Z_i(t) | \text{rest} \sim N_A(\mathbf{X}_i(t)' \boldsymbol{\beta}(s_i, t), 1)$ , where  $N_A(\mu, \sigma^2)$  is the truncated normal distribution with domain  $A$ , location  $\mu$ , and scale  $\sigma$ . For this probit model  $A = (\infty, 0)$  if  $Y_i(t) = 0$ , and  $A = (0, \infty)$  if  $Y_i(t) = 1$ .

2.  $\eta_j | \text{rest} \sim N\left(\frac{\sum_{i=1}^n \sum_{t=1}^{t_i} X_{ji} r_i(t)}{\sum_{i=1}^n \sum_{t=1}^{t_i} X_{ji}^2 + 1/c_j^2}, \frac{1}{\sum_{i=1}^n \sum_{t=1}^{t_i} X_{ji}^2 + 1/c_j^2}\right)$ .

3.  $\boldsymbol{\mu}_j | \text{rest} \sim N\left([P + Q]^{-1} R, [P + Q]^{-1}\right)$ , where  $R$  is the vector with element  $s$  equal to  $\sum_{i|s_i=s} \sum_{t=1}^{t_i} X_{ji} r_i(t)$ ,  $Q = (M_S - \rho_{\mu_j} C_S) / \sigma_{\mu_j}^2$ , and  $P$  is diagonal with  $s^{th}$  diagonal element equal to  $\sum_{i|s_i=s} \sum_{t=1}^{t_i} X_{ji}^2$ .
4.  $\boldsymbol{\gamma}_j | \text{rest} \sim N\left([P + Q]^{-1} R, [P + Q]^{-1}\right)$ , where  $R$  is the vector with element  $s$  equal to  $\sum_{i|t_i \geq t} X_{ji} r_i(t)$ ,  $Q = (M_T - \rho_{\gamma_j} C_T) / \sigma_{\gamma_j}^2$ , and  $P$  is diagonal with  $s^{th}$  diagonal element equal to  $\sum_{i|t_i \geq t} X_{ji}^2$ .
5.  $\theta_j(, t) | \text{rest} \sim N\left(\left[P + (1 + \rho_{\theta_j}^2)Q\right]^{-1} \left[R + \rho_{\theta_j} \theta_j(, t-1) + \rho_{\theta_j} \theta_j(, t+1)\right], \left[P + (1 + \rho_{\theta_j}^2)Q\right]^{-1}\right)$  where  $R$  is the vector with element  $s$  equal to  $\sum_{i|s_i=s, t_i \geq t} X_{ji} r_i(t)$ ,  $Q = (M_T - \rho_{\delta_j} C_T) / \sigma_{\delta_j}^2$ , and  $P$  is diagonal with  $s^{th}$  diagonal element equal to  $\sum_{i|s_i=s, t_i \geq t} X_{ji}^2$
6.  $\sigma_{\mu_j}^2 | \text{rest} \sim \text{InvGamma}(n_s/2 + a_1, \boldsymbol{\mu}'_j (M_S - \rho_{\mu_j} C_S) \boldsymbol{\mu}_j / 2 + b_1)$
7.  $\sigma_{\gamma_j}^2 | \text{rest} \sim \text{InvGamma}(n_t/2 + a_1, \boldsymbol{\gamma}'_j (M_T - \rho_{\gamma_j} C_T) \boldsymbol{\gamma}_j / 2 + b_1)$
8.  $\sigma_{\delta_j}^2 | \text{rest} \sim \text{InvGamma}((nt-1)n_s/2 + a_1, \sum_{t=2}^{nt} (\theta_j(, t) - \rho_{\theta_j} \theta_j(, t-1))' (M_S - \rho_{\delta_j} C_S) (\theta_j(, t) - \rho_{\theta_j} \theta_j(, t-1)) / 2 + b_1)$

Finally the association parameters  $\rho_{\mu_j}$ ,  $\rho_{\gamma_j}$ ,  $\rho_{\theta_j}$ , and  $\rho_{\delta_j}$ , have discrete priors, and thus discrete full conditionals. The full conditional probabilities are proportional to the product of the prior and the appropriate CAR density.

## References

- Banerjee, S., Carlin, B., Gelfand, A. (2003). Hierarchical modeling and analysis for spatial data. Chapman & Hall.
- Kelsall, J. E., Wakefield, J. C., Bernardo, J. M., Berger, J. O., Dawid, A. P., Smith, A. (ed.) (1999). Comment on Bayesian model for spatially correlated disease and exposure data in Bayesian Statistics 6 - Proceedings of the Sixth Valencia International Meeting Oxford University Press

## 2 Supplementary Application Results

Table 1: Deviance information criterion ( $DIC$ ), effective degrees of freedom ( $p_D$ ), and posterior predictive loss (PPD) for different preterm birth baseline hazard models and  $PM_{2.5}$  exposure metrics.

| Baseline Hazard        | Cumulative |      |      | 4-week lag |      |      |
|------------------------|------------|------|------|------------|------|------|
|                        | DIC        | pD   | PPD  | DIC        | pD   | PPD  |
| Non-spatial            | 44178      | 35.5 | 8429 | 44187      | 36.9 | 8423 |
| Spatial frailty        | 44179      | 54.2 | 8429 | 44187      | 54.5 | 8429 |
| Space-time interaction | 44180      | 72.5 | 8424 | 44190      | 74.2 | 8433 |

Table 2: Posterior median and 95% posterior intervals (P.I.) of the baseline hazard parameters. Estimates are from a model that includes space-time interaction baseline hazards and average  $PM_{2.5}$  levels over the entire pregnancy.

| Parameter     | Posterior median (95% P.I.) | Parameter       | Posterior median (95% P.I.) |
|---------------|-----------------------------|-----------------|-----------------------------|
| $\rho_\mu$    | 0.96 (0.73, 1.00)           | $\sigma_\mu$    | 0.21 (0.13, 0.42)           |
| $\rho_\gamma$ | 0.40 (0.02, 0.93)           | $\sigma_\gamma$ | 0.06 (0.04, 0.10)           |
| $\rho_\delta$ | 0.39 (0.02, 0.94)           | $\sigma_\delta$ | 0.06 (0.03, 0.10)           |
| $\rho_\theta$ | 0.24 (0.01, 0.73)           |                 |                             |

### 3 Supplementary Simulation Results

Table 3: Simulation study results: root mean-squared error (RMSE) and 95% confidence interval (C.I.) length based on 1000 simulated replicate datasets.

| Relative Risk | RMSE ( $\times 100$ ) |        |            |        | 95% C.I. length |        |            |        |
|---------------|-----------------------|--------|------------|--------|-----------------|--------|------------|--------|
|               | Cumulative            |        | 4-week lag |        | Cumulative      |        | 4-week lag |        |
|               | Survival              | Probit | Survival   | Probit | Survival        | Probit | Survival   | Probit |
| 1.00          | 0.58                  | 0.83   | 0.34       | 0.57   | 0.96            | 0.94   | 0.96       | 0.90   |
| 1.01          | 0.62                  | 0.94   | 0.35       | 0.59   | 0.95            | 0.91   | 0.95       | 0.87   |
| 1.02          | 0.61                  | 0.98   | 0.35       | 0.61   | 0.95            | 0.90   | 0.95       | 0.85   |
| 1.03          | 0.61                  | 1.02   | 0.34       | 0.65   | 0.94            | 0.89   | 0.95       | 0.84   |
| 1.04          | 0.61                  | 1.15   | 0.34       | 0.67   | 0.95            | 0.85   | 0.96       | 0.81   |
| 1.05          | 0.62                  | 1.24   | 0.35       | 0.69   | 0.95            | 0.80   | 0.95       | 0.79   |

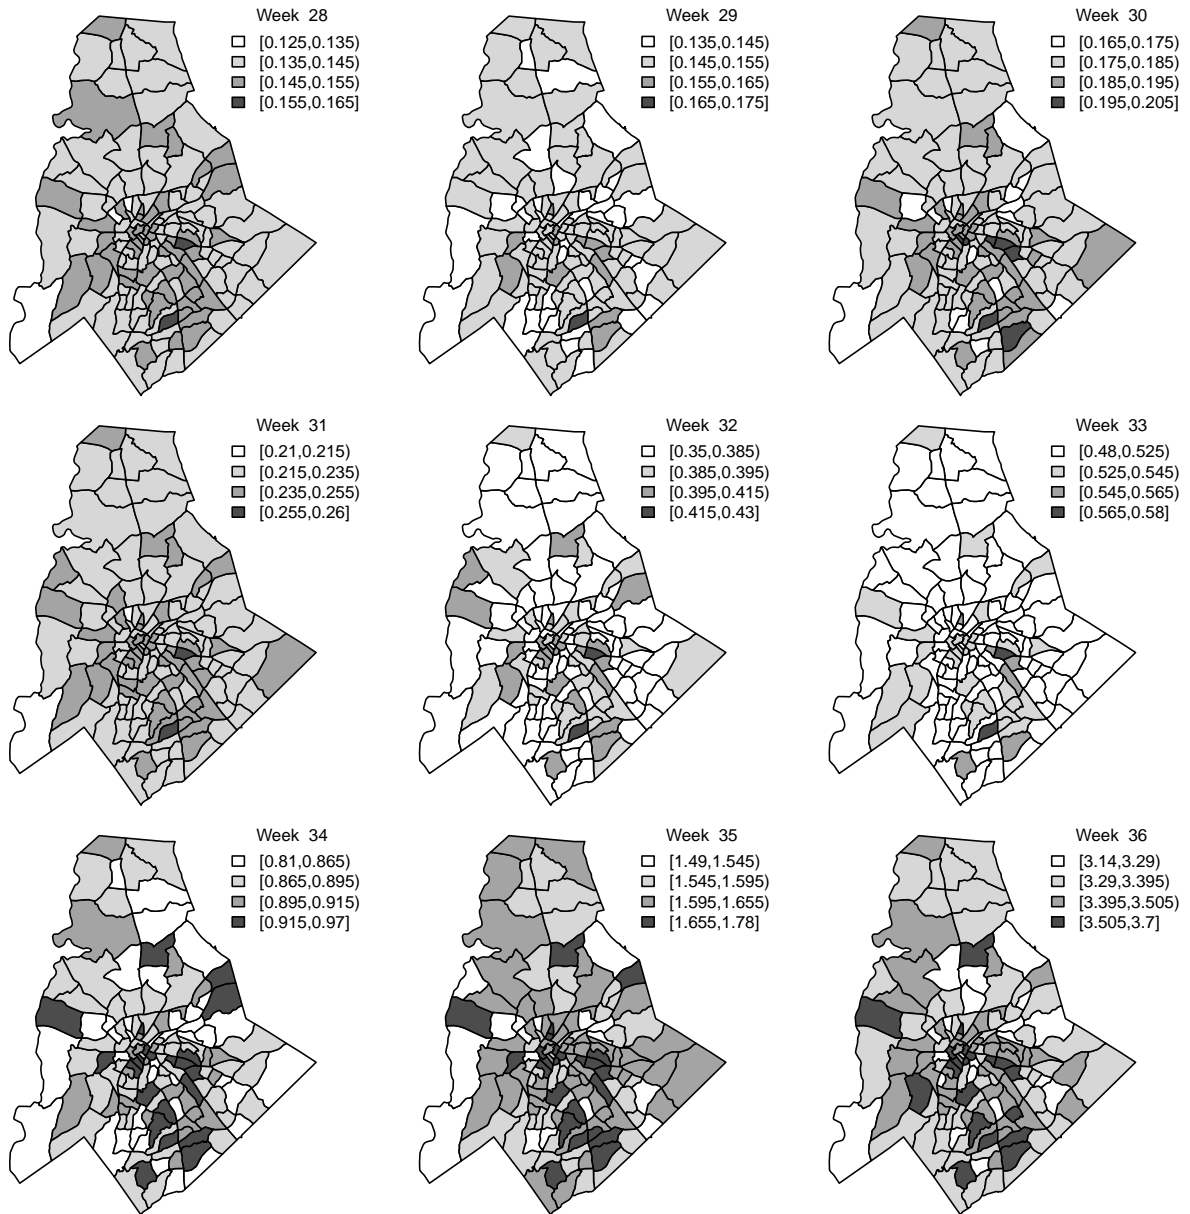

Figure 1: Baseline tract-specific hazard rates (%) of preterm birth. Baseline hazard rates are calculated at the average value of each covariate across all areas. Estimates are from a model that includes space-time interaction baseline hazards and average  $PM_{2.5}$  levels over the entire pregnancy.

## 4 R Code

```
library(survival)
library(fields)

#DATA:
#Y[i,t]= 1 if sub i failed at time t,
#      = 0 if sub i lived past time t
#      = NA if sub i died before time t
#x=covariates = n subs x ntimes x n covs
#spatial location, s=1,...,ns (no regions without observations!)
#The neighbor pairs are (np1[i],np2[i]),i=1,...,number of pairs

#MODEL:
#Y[i,t] = I(Z[i,t]>0)
#Z[i,t] ~ N(x[i,t,]*%(int+space[s[i],]+time[t,]+theta[t,s[i],]),1)
#Space[,k]~CAR(tau1[k],rho1[k])
#Time[,k]~CAR(tau2[k],rho2[k])
#theta[,1,k]=0
#theta[t,,k] ~ rho4*theta[t-1,,j]+CAR(tau3[k],rho3[k])

#MODEL OPTIONS/HYPERPARAMETERS
#spatial[k] = does beta_k have a spatial effect?
#temporal[k] = does beta_k have a temporal effect?
#spatiotemporal[k] = does beta_k have a spatiotemporal effect?
#tau[k]~gamma(as,bs)
#rho[k]~beta(ar,br)

probit.PH<-function(Y,x,s,np1,np2,
  spatial=rep(F,1000),temporal=rep(F,1000),spatiotemporal=rep(F,1000),
  sd.beta=100,
  as=0.5,bs=0.005,ar=1,br=1,
  runs=5000,burn=1000,update=10){

  #Set up data:
  n<-nrow(Y)
  nt<-ncol(Y)
  p<-dim(x)[3]
  ns<-max(c(np1,np2))
  O<-!is.na(Y)
  L<-ifelse(Y==0,-Inf,0)
  U<-ifelse(Y==0,0,Inf)
  for(k in 1:p){for(t in 1:nt){x[!O[,t],t,k]<-0}}

  #spatial adjacency matrix:
  ADJs<-matrix(0,ns,ns)
  for(j in 1:length(np1)){
    ADJs[np1[j],np2[j]]<-ADJs[np2[j],np1[j]]<-1
  }
  Ms<-diag(apply(ADJs,2,sum))

  #temporal adjacency matrix:
  ADJt<-matrix(0,nt,nt)
  for(j in 2:nt){
```

```

    ADJt[j, j-1]<-ADJt[j-1, j]<-1
  }
Mt<-diag(apply(ADJt,2,sum))

#initial values
Z<-Y-0.5
Z[!0]<-0
int<-rep(0,p)
theta<-array(0,c(nt,ns,p))
space<-matrix(0,ns,p)
time<-matrix(0,nt,p)
tau1<-tau2<-tau3<-rep(1,p)
rho1<-rho2<-rho3<-rho4<-rep(0.9,p)

mn<-0*Z
for(t in 1:nt){
  mn[,t]<-x[,t,]*%(int+time[t,])+
    apply(x[,t,]*(space[s,]+theta[t,s,]),1,sum)
}

#keep track of stuff:
keep.int<-matrix(0,runs,p)
beta.mn<-beta.var<-beta.pos<-0*theta
params<-matrix(0,runs,7*p)
#baseline.track <- array (0, c(nt, ns, runs) )
dev<-rep(0,runs)

dimnames(params)[[2]]<-c(paste("sd1[",1:p,"]",sep=""),
  paste("sd2[",1:p,"]",sep=""),
  paste("sd3[",1:p,"]",sep=""),
  paste("rho1[",1:p,"]",sep=""),
  paste("rho2[",1:p,"]",sep=""),
  paste("rho3[",1:p,"]",sep=""),
  paste("rho4[",1:p,"]",sep=""))

#set up prior for the CAR parameters
M2<-diag(1/sqrt(diag(Ms)))
ds<-eigen(M2%%ADJs%%M2)$values
M2<-diag(1/sqrt(diag(Mt)))
dt<-eigen(M2%%ADJt%%M2)$values
rm(M2)
nrho<-1000
canrho1<-detpart1<-qbeta(seq(0.001,0.999,length=nrho),ar,br)
canrho2<-detpart2<-qbeta(seq(0.001,0.999,length=nrho),ar,br)
canrho3<-detpart3<-qbeta(seq(0.001,0.999,length=nrho),ar,br)
canrho4<-qbeta(seq(0.001,0.999,length=nrho),ar,br)
for(j in 1:nrho){
  detpart1[j]<-0.5*sum(log(1-canrho1[j]*ds))
  detpart2[j]<-0.5*sum(log(1-canrho2[j]*dt))
  detpart3[j]<-0.5*(nt-1)*sum(log(1-canrho3[j]*ds))
}

#Save some loops:
x2<-x^2

```



```

x2forint<-apply(x2,3,sum)
x2forspace<-array(0,c(nt,ns,p))
for(k in 1:p){for(j in 1:nt){
  x2forspace[j,,k]<-tapply(x2[,j,k],s,sum)
}}
x2fortime<-apply(x2,2:3,sum)

#Start MCMC:
for(i in 1:runs){

#####
#####      update the latent z's      #####
#####:
for(j in 1:nt){
  Z[,j]<-rtnorm(mn[,j],L[,j],U[,j])
}
Z[!0]<-0

#####
#####      update intercepts      #####
#####:
for(k in 1:p){
  mn<-mn-x[, ,k]*int[k]
  r<-Z-mn
  VVV<-x2forint[k]+1/sd.beta^2
  MMM<-sum(x[, ,k]*r)
  int[k]<-rnorm(1,MMM/VVV,1/sqrt(VVV))
  mn<-mn+x[, ,k]*int[k]
}

#####
#####      update spatial random effects      #####
#####:

for(k in 1:p){if(spatial[k]){
  for(t in 1:nt){mn[,t]<-mn[,t]-x[,t,k]*space[s,k]}
  r<-Z-mn
  VVV<-tau1[k]*(Ms-rho1[k]*ADJs)+diag(apply(x2forspace[, ,k],2,sum))
  MMM<-tapply(apply(x[, ,k]*r,1,sum),s,sum)
  VVV<-solve(VVV)
  space[,k]<-VVV%*%MMM + t(chol(VVV))%*%rnorm(ns)
  for(t in 1:nt){mn[,t]<-mn[,t]+x[,t,k]*space[s,k]}

  #CAR covariance parameters:
  SS1<-t(space[,k])%*%Ms%*%space[,k]
  SS2<-t(space[,k])%*%ADJs%*%space[,k]
  tau1[k]<-rgamma(1,ns/2+as,(SS1-rho1[k]*SS2)/2+bs)
  R<-detpart1+0.5*tau1[k]*canrho1*SS2
  rho1[k]<-sample(canrho1,1,prob=exp(R-max(R)))
}}

#####
#####      update temporal random effects      #####
#####:

```

```

#####:

for(k in 1:p){if(temporal[k]){
  for(t in 1:nt){mn[,t]<-mn[,t]-x[,t,k]*time[t,k]}
  r<-Z-mn
  VVV<-tau2[k]*(Mt-rho2[k]*ADJt)+diag(x2fortime[,k])
  MMM<-apply(x[, ,k]*r,2,sum)
  VVV<-solve(VVV)
  time[,k]<-VVV%*%MMM + t(chol(VVV))%*%rnorm(nt)
  for(t in 1:nt){mn[,t]<-mn[,t]+x[,t,k]*time[t,k]}

  #CAR covariance parameters:
  SS1<-t(time[,k])%*%Mt%*%time[,k]
  SS2<-t(time[,k])%*%ADJt%*%time[,k]
  tau2[k]<-rgamma(1,nt/2+as,(SS1-rho2[k]*SS2)/2+bs)
  R<-detpart2+0.5*tau2[k]*canrho2*SS2
  rho2[k]<-sample(canrho2,1,prob=exp(R-max(R)))
}}

#####
##### update spatiotemporal random effects #####
#####:
theta[1,,]<-0
for(k in 1:p){if(spatiotemporal[k]){
  for(t in 1:nt){mn[,t]<-mn[,t]-x[,t,k]*theta[t,s,k]}
  r<-Z-mn
  Q3<-tau3[k]*(Ms-rho3[k]*ADJs)
  for(j in 2:nt){
    #prior's contribution:
    VVV<-Q3
    MMM<-rho4[k]*Q3%*%theta[j-1,,k]
    if(j<nt){VVV<-VVV+rho4[k]*rho4[k]*Q3}
    if(j<nt){MMM<-MMM+rho4[k]*Q3%*%theta[j+1,,k]}

    #likelihood's contribution:
    diag(VVV)<-diag(VVV)+x2forspace[j,,k]
    MMM<-as.vector(MMM)+tapply(x[,j,k]*r[,j],s,sum)
    VVV<-solve(VVV)
    theta[j,,k]<-VVV%*%MMM + t(chol(VVV))%*%rnorm(ns)
  }
  for(t in 1:nt){mn[,t]<-mn[,t]+x[,t,k]*theta[t,s,k]}

  #CAR covariance parameters:
  SS1<-SS2<-rep(0,nt)
  for(j in 2:nt){
    ddd<-theta[j,,k]-rho4[k]*theta[j-1,,k]
    SS1[j]<-t(ddd)%*%Ms%*%ddd
    SS2[j]<-t(ddd)%*%ADJs%*%ddd
  }

  tau3[k]<-rgamma(1,ns*(nt-1)/2+as,sum(SS1-rho3[k]*SS2)/2+bs)
  R<-detpart3+0.5*tau3[k]*canrho3*sum(SS2)
  rho3[k]<-sample(canrho3,1,prob=exp(R-max(R)))
  Q3<-Ms-rho3[k]*ADJs
}
}

```

```

SS3<-SS4<-rep(0,nt)
for(j in 2:nt){
  SS3[j]<-t(theta[j,,k])%*%Q3%*%theta[j-1,,k]
  SS4[j]<-t(theta[j-1,,k])%*%Q3%*%theta[j-1,,k]
}
R<- -0.5*tau3[k]*(-2*canrho4*sum(SS3)+canrho4*canrho4*sum(SS4))
rho4[k]<-sample(canrho4,1,prob=exp(R-max(R)))
}}

#keep track of stuff:
beta<-theta
for(k in 1:p){
  beta[,k]<-beta[,k]+int[k]
  for(j in 1:ns){beta[,j,k]<-beta[,j,k]+time[,k]}
  for(j in 1:nt){beta[j,,k]<-beta[j,,k]+space[,k]}
}

#baseline.track[,i] <- beta[,1]
keep.int[i,]<-int
dev[i]<-sum(-2*dbinom(Y[0],1,pnorm(mn[0]),log=T))
params[i,]<-c(1/sqrt(tau1),1/sqrt(tau2),1/sqrt(tau3),rho1,rho2,rho3,rho4)

if(i>burn){
  beta.mn<-beta.mn+beta/(runs-burn)
  beta.var<-beta.var+beta*beta/(runs-burn)
  beta.pos<-beta.pos+ifelse(beta>0,1,0)/(runs-burn)
}

}
beta.var<-beta.var-beta.mn^2
mn<-0*Z
for(t in 1:nt){
  mn[,t]<-apply(x[,t,]*beta.mn[t,s,],1,sum)
}
dhat<-sum(-2*dbinom(Y[0],1,pnorm(mn[0]),log=T))
dbar<-mean(dev[burn:runs])
pD<-dbar-dhat
DIC<-dbar+pD

list(beta.mn=beta.mn,beta.var=beta.var,beta.pos=beta.pos,
      CAR.params=params,int=keep.int, #baseline = baseline.track,
      dev=dev,dbar=dbar,pD=pD,DIC=DIC)}

#OUTPUT:
#beta[t,s,k] is the regression coefficient for time t, site s, covariate k
#beta.mn is the posterior mean of beta
#beta.var is the posterior variance of beta
#beta.pos is the posterior prob that beta is positive
#par.params has the draws of the CAR covariance parameters
#int has the draws of the overall average of each regression coefficient
#dev is the draws of the deviance

```

```
#DIC, dbar, and pD are DIC statistics
```

```
#generate truncated normals  
rtnorm<-function(m,l,u){  
  q1<-pnorm(l,m,1)  
  q2<-pnorm(u,m,1)  
  qnorm(runif(length(m),q1,q2),m,1)  
}
```
